# Supplementary material
Source: PubMed Central journal article supplement (PMC4620040)
Supplement: NIHMS724581-supplement-Supplement.pdf [file NIHMS724581-supplement-Supplement.pdf]

**Supplemental Table 1** Genetic loci linked to CD and/or UC. Most gene deserts associated with CD and/or UC with no immediate candidate genes have been omitted from the table. Please note that at multiple associated genetic loci genetically (or functionally) 'causal' genes have not been identified yet, and the most likely candidates are presented as suggested in the original reports.

| Chr  | putative gene          | Gene name                                                                 | CD  | UC  | Reference |
|------|------------------------|---------------------------------------------------------------------------|-----|-----|-----------|
| 1p13 | <i>PTPN22</i>          | protein tyrosine phosphatase, non-receptor type 22 (lymphoid)             | yes |     | (1)       |
| 1p31 | <i>IL23R</i>           | interleukin 23 receptor                                                   | yes | yes | (2)       |
| 1p36 | <i>PLA2G2E</i>         | phospholipase A2, group IIE                                               |     | yes | (3)       |
| 1q21 | <i>ECM1</i>            | extracellular matrix protein 1                                            |     | yes | (4)       |
| 1q23 | <i>ITLN1</i>           | intelectin 1 (galactofuranose binding)                                    | yes |     | (1)       |
| 1q32 | <i>IL10</i>            | interleukin 10                                                            |     | yes | (5)       |
| 1q44 | <i>NLRP3</i>           | NLR family, pyrin domain containing 3                                     | yes |     | (6)       |
| 2p16 | <i>PUS10</i>           | pseudouridylate synthase 10                                               | yes | yes | (1, 3)    |
| 2q11 | <i>IL18RAP</i>         | interleukin 18 receptor accessory protein                                 | yes | yes | (1, 7)    |
| 2q35 | <i>ARPC2</i>           | actin related protein 2/3 complex, subunit 2, 34kDa                       |     | yes | (5)       |
| 2q37 | <i>ATG16L1</i>         | ATG16 autophagy related 16-like 1                                         | yes |     | (8)       |
| 3p12 | <i>CADM2</i>           | cell adhesion molecule 2                                                  |     | yes | (5)       |
| 3p21 | <i>MST1</i>            | macrophage stimulating 1 (hepatocyte growth factor-like)                  | yes | yes | (1, 4)    |
| 3p21 | <i>BSN</i>             | bassoon (presynaptic cytomatrix protein)                                  | yes | yes | (9, 10)   |
| 4p13 | <i>PHOX2B</i>          | paired-like homeobox 2b                                                   | yes |     | (11)      |
| 5p13 | <i>desert (PTGER4)</i> | prostaglandin E receptor 4 (subtype EP4)                                  | yes | yes | (3, 12)   |
| 5q13 | <i>S100Z</i>           | S100 calcium binding protein Z                                            |     | yes | (5)       |
| 5q31 | <i>SLC22A5</i>         | solute carrier family 22 (organic cation/carnitine transporter), member 5 | yes |     | (13)      |
| 5q33 | <i>IRGM</i>            | immunity-related GTPase family, M                                         | yes |     | (1)       |
| 5q33 | <i>IL12B</i>           | interleukin 12B                                                           | yes | yes | (10, 14)  |
| 6p21 | <i>BTNL2</i>           | butyrophilin-like 2 (MHC class II associated)                             | yes | yes | (5)       |
| 6p21 | HLA                    | major histocompatibility complex                                          | yes | yes |           |
| 6p22 | <i>CDKAL1</i>          | CDK5 regulatory subunit associated protein 1-like 1                       | yes |     | (1)       |
| 6q23 | <i>TNFAIP3</i>         | tumor necrosis factor, alpha-induced protein 3 (A20)                      | yes |     | (9)       |
| 6q27 | <i>CCR6</i>            | chemokine (C-C motif) receptor 6                                          | yes |     | (1)       |
| 7q32 | <i>IRF5</i>            | interferon regulatory factor 5                                            | yes | yes | (15)      |
| 9p24 | <i>JAK2</i>            | Janus kinase 2                                                            | yes | yes | (1, 7)    |
| 9q32 | <i>TNFSF15</i>         | tumor necrosis factor (ligand) superfamily, member 15                     | yes |     | (1)       |
| 9q33 | <i>TLR4</i>            | toll-like receptor 4                                                      | yes |     | (16)      |
| 9q34 | <i>CARD9</i>           | caspase recruitment domain family, member 9                               | yes | yes | (17)      |

| Chr   | putative gene       | Gene name                                                    | CD  | UC  | Reference |
|-------|---------------------|--------------------------------------------------------------|-----|-----|-----------|
| 10p11 | <i>CCNY</i>         | cyclin Y                                                     | yes | yes | (9, 10)   |
| 10q21 | <i>ZNF365</i>       | zinc finger protein 365                                      | yes |     | (1)       |
| 10q23 | <i>DLG5</i>         | discs, large homolog 5                                       | yes |     | (18)      |
| 10q24 | <i>NKX2-3</i>       | NK2 transcription factor related, locus 3                    | yes | yes | (1, 10)   |
| 10q26 | <i>DMBT1</i>        | deleted in malignant brain tumors 1                          | yes |     | (19)      |
| 11p15 | <i>NELL1</i>        | NEL-like 1                                                   | yes | yes | (20)      |
| 11q13 | <i>C11orf30</i>     | chromosome 11 open reading frame 30                          | yes |     | (1)       |
| 12q12 | <i>LRRK2, MUC19</i> | leucine-rich repeat kinase 2                                 | yes |     | (1)       |
| 12q15 | <i>IFNG</i>         | interferon, gamma                                            |     | yes | (7)       |
| 15q13 | <i>HERC2</i>        | hect domain and RLD 2                                        | yes | yes | (9, 10)   |
| 16q12 | <i>NOD2</i>         | nucleotide-binding oligomerization domain containing 2       | yes |     | (21-23)   |
| 16q24 | <i>FAM92B</i>       | family with sequence similarity 92, member B                 | yes |     | (11)      |
| 17q21 | <i>STAT3</i>        | signal transducer and activator of transcription 3           | yes | yes | (1, 10)   |
| 17q21 | <i>ORMDL3</i>       | ORM1-like 3                                                  | yes |     | (1)       |
| 18p11 | <i>PTPN2</i>        | protein tyrosine phosphatase, non-receptor type 2            | yes |     | (9, 10)   |
| 20q13 | <i>TNFRSF6B</i>     | tumor necrosis factor receptor superfamily, member 6b, decoy | yes | yes | (24)      |
| 21q22 | <i>ICOSLG</i>       | inducible T-cell co-stimulator ligand                        | yes |     | (1)       |
| 21q22 | <i>PSMG1</i>        | proteasome (prosome, macropain) assembly chaperone 1         | yes | yes | (24)      |
| 22q12 | <i>XPB1</i>         | X-box binding protein 1                                      | yes | yes | (25)      |
| 22q12 | <i>NCF4</i>         | neutrophil cytosolic factor 4, 40kDa                         | yes |     | (11)      |

**Supplemental Table 2.** Efficacy of classical therapeutics and biological agents in clinical trials of Crohn's disease and ulcerative colitis. Shown is the success or failure of therapeutics in patients with active disease (AD) or for maintenance of remission (M). The type of clinical trial is indicated (P, phase; MA, meta-analysis; RCT, randomized controlled trial). 5-ASA, 5-aminosalicylic acid; 6-MP, 6-mercaptopurin; CTLA-4, cytotoxic T-lymphocyte antigen 4; CRP, C-reactive protein; GM-CSF, granulocyte macrophage colony-stimulating factor; ICAM-1, intercellular adhesion molecule 1; mAbs, monoclonal antibodies; MAPK, mitogen-activated protein kinase; mTOR, mammalian target of rapamycin; PPAR, peroxisome proliferator-activated receptor; rhIL-10, recombinant human IL-10.

|                        |                                | Crohn's disease                            |                                  | Ulcerative colitis   |                                       |         |
|------------------------|--------------------------------|--------------------------------------------|----------------------------------|----------------------|---------------------------------------|---------|
|                        | drug                           | Mechanism                                  | success                          | failure              | success                               | failure |
| Classical therapeutics | <b>5-ASA / sulfasalazine</b>   | PPAR $\gamma$ agonist and other mechanisms | Mild to moderate AD (MA) (26-28) |                      | Mild to moderate AD + M (MA) (29, 30) |         |
|                        | <b>Corticosteroids</b>         | Various mechanisms                         | AD (MA) (31, 32)                 |                      | AD (RCT) (33-35)                      |         |
|                        | <b>Azathioprine/ 6-MP</b>      | Purine synthesis inhibitor                 | M (MA) (36)                      |                      | AD + M (P2 RCT) (37, 38)              |         |
|                        | <b>Methotrexate</b>            | Antimetabolite                             | AD + M (MA/P2 RCT) (39, 40)      |                      |                                       |         |
|                        | <b>Cyclosporine</b>            | Calcineurin inhibitor                      |                                  | AD (MA) (41)         | AD (P2 RCT) (42, 43)                  |         |
|                        | <b>Tacrolimus</b>              | Calcineurin inhibitor                      |                                  |                      | AD (P2 RCT) (44)                      |         |
|                        | <b>Antibiotics</b>             | Modulation of the microbial flora          | AD (MA) (45)                     |                      | AD (MA) (46)                          |         |
| cytokine targeting     | <b>Infliximab</b>              | Anti-TNF $\alpha$ antibody                 | AD + M (P3 RCT) (47-50)          |                      | AD (P3 RCT) (51)                      |         |
|                        | <b>Adalimumab</b>              | Anti-TNF $\alpha$ antibody                 | AD + M (P3 RCT) (52-54)          |                      |                                       |         |
|                        | <b>Certolizumab</b>            | Anti-TNF $\alpha$ antibody                 | AD + M (P3 RCT) (55, 56)         |                      |                                       |         |
|                        | <b>Fontolizumab</b>            | Anti-IFN $\gamma$ antibody                 |                                  | AD (P2 RCT) (57, 58) |                                       |         |
|                        | <b>ABT-874</b>                 | Anti-IL-12/IL-23p40                        | AD (P2 RCT) (59)                 |                      |                                       |         |
|                        | <b>Ustekinumab (CNTO 1275)</b> | Anti-IL-12/IL-23p40                        | AD (P2 RCT) (60)                 |                      |                                       |         |

|                                   |                                                | Crohn's disease                                                 |                                                                       | Ulcerative colitis    |                  |                                                  |
|-----------------------------------|------------------------------------------------|-----------------------------------------------------------------|-----------------------------------------------------------------------|-----------------------|------------------|--------------------------------------------------|
|                                   | drug                                           | Mechanism                                                       | success                                                               | failure               | success          | failure                                          |
|                                   | <b>STA-5326</b>                                | Small molecule inhibitor of IL-12/IL23                          | AD (P1/2a) (61)                                                       |                       |                  |                                                  |
|                                   | <b>Atlizumab/<br/>Tocilizumab</b>              | Anti-IL-6R antibody                                             | AD (P2 RCT) (62)                                                      |                       |                  |                                                  |
|                                   | <b>rhIL-10</b>                                 | IL-10                                                           |                                                                       | AD (P3 RCT) (63, 64)  |                  | AD (P2 RCT) (65)                                 |
|                                   | <b>Oprelvekin</b>                              | Recombinant IL-11                                               |                                                                       | AD (P2 RCT) (66)      |                  | AD (RCT, terminated)                             |
|                                   | <b>pegylated IFN-<math>\alpha</math>2b</b>     | Interferon alpha                                                |                                                                       |                       |                  | AD (P2 RCT) (67)                                 |
|                                   | <b>IFN-<math>\beta</math>1a</b>                | Interferon beta                                                 |                                                                       | AD + MA (P2 RCT) (68) |                  | AD (P2, MA) (69, 70)                             |
|                                   | <b>RDP58</b>                                   | Decapeptide disrupting the MyD88-IRAK-TRAF6 protein complex (?) |                                                                       |                       | AD (P2 RCT) (71) |                                                  |
| anti-adhesion/anti-chemokine mAbs | <b>Natalizumab</b>                             | Anti- $\alpha$ 4 Integrin antibody                              | AD in patients with $\uparrow$ CRP, M for responders (P3 RCT) (72-74) |                       |                  |                                                  |
|                                   | <b>MLN002, Vedolizumab</b>                     | Anti- $\alpha$ 4 $\beta$ 7 Integrin antibody                    | +/- in AD (P2 RCT) (75)                                               |                       | AD (P2 RCT) (76) |                                                  |
|                                   | <b>Alicaforsen</b>                             | ICAM-1 antisense oligonucleotide                                |                                                                       | AD (P2 RCT) (77)      |                  | AD (P2 RCT) (78)                                 |
|                                   | <b>CCX282-B</b>                                | CCR9 antagonist                                                 | +/- in AD (P2) (79, 80)                                               |                       |                  |                                                  |
| modulation of T cell responses    | <b>Visilizumab</b>                             | Anti-CD3 antibody                                               |                                                                       |                       |                  | terminated (no efficacy/inferior safety profile) |
|                                   | <b>Basiliximab</b>                             | Anti-CD25 antibody                                              |                                                                       |                       |                  | AD (P2 RCT) (81)                                 |
|                                   | <b>Daclizumab</b>                              | Anti-CD25 antibody                                              |                                                                       |                       |                  | AD (P2 RCT) (82)                                 |
|                                   | <b>Ch5D12</b>                                  | Anti-CD40 antibody                                              | AD (P1/2a) (83)                                                       |                       |                  |                                                  |
|                                   | <b>Hematopoietic stem cell transplantation</b> | Autologous and allogeneic stem cell transplantation             | AD (uncontrolled trials) (84-87)                                      |                       |                  |                                                  |
|                                   | <b>Leukocytapheresis</b>                       | Leukocyte replacement with naive bone marrow-derived cells      |                                                                       | AD (P2/3) (88)        |                  |                                                  |

|                 |                                  | Crohn's disease |                               | Ulcerative colitis |                        |                  |                  |
|-----------------|----------------------------------|-----------------|-------------------------------|--------------------|------------------------|------------------|------------------|
|                 |                                  | drug            | Mechanism                     | success            | failure                | success          | failure          |
| MAPK inhibitors | <b>Semapimod (CNI-1493)</b>      |                 | MAPK inhibitor                | AD (P1) (89)       |                        |                  |                  |
|                 | <b>Doramapimod (BIRB796)</b>     |                 | MAPK inhibitor                |                    | AD (P2 RCT) (90)       |                  |                  |
| growth factors  | <b>Sargramostim</b>              |                 | GM-CSF                        |                    | AD (P3 RCT) (91, 92)   |                  |                  |
|                 | <b>Somatotropin</b>              |                 | Human growth hormone          | AD (P2) (93)       |                        |                  |                  |
|                 | <b>Repifermin (KGF2)</b>         |                 | Keratinocyte growth factor    |                    |                        |                  | AD (P2 RCT) (94) |
|                 | <b>Epithelial growth factor</b>  |                 | Epithelial growth factor      |                    |                        | AD (P2 RCT) (95) |                  |
| miscellaneous   | <b>Rosiglitazone</b>             |                 | PPAR- $\gamma$ agonist        |                    |                        | AD (P2 RCT) (96) |                  |
|                 | <b>Tetomilast (OPC-6535)</b>     |                 | Phosphodiesterase-4 inhibitor |                    |                        |                  | AD (P2 RCT) (97) |
|                 | <b>Everolimus</b>                |                 | mTOR inhibitor                |                    | M (P2 RCT) (98)        |                  |                  |
|                 | <b>Kremezin (AST-120)</b>        |                 | Carbon adsorbent              |                    |                        | AD (P1) (99)     |                  |
|                 | <b>Thalidomide/ Lenalidomide</b> |                 | unknown                       |                    | AD (P2 RCT) (100, 101) |                  |                  |
|                 | <b>Epanova</b>                   |                 | Omega 3 fatty acid            |                    | M (P3 RCT) (102)       |                  |                  |
|                 | <b>Probiotics</b>                |                 |                               |                    | M (MA) (103)           |                  | AD (MA) (104)    |

## Supplementary References

1. Barrett JC, Hansoul S, Nicolae DL, Cho JH, Duerr RH, et al. 2008. Genome-wide association defines more than 30 distinct susceptibility loci for Crohn's disease. *Nat. Genet.* 40:955–62
2. Duerr RH, Taylor KD, Brant SR, Rioux JD, Silverberg MS, et al. 2006. A genome-wide association study identifies IL23R as an inflammatory bowel disease gene. *Science* 314:1461–63
3. Silverberg MS, Cho JH, Rioux JD, McGovern DP, Wu J, et al. 2009. Ulcerative colitis-risk loci on chromosomes 1p36 and 12q15 found by genome-wide association study. *Nat. Genet.* 41:216–20
4. Fisher SA, Tremelling M, Anderson CA, Gwilliam R, Bumpstead S, et al. 2008. Genetic determinants of ulcerative colitis include the ECM1 locus and five loci implicated in Crohn's disease. *Nat. Genet.* 40:710–12
5. Franke A, Balschun T, Karlsen TH, Sventoraityte J, Nikolaus S, et al. 2008. Sequence variants in IL10, ARPC2 and multiple other loci contribute to ulcerative colitis susceptibility. *Nat. Genet.* 40:1319–23
6. Villani AC, Lemire M, Fortin G, Louis E, Silverberg MS, et al. 2009. Common variants in the NLRP3 region contribute to Crohn's disease susceptibility. *Nat. Genet.* 41:71–76
7. Anderson CA, Massey DC, Barrett JC, Prescott NJ, Tremelling M, et al. 2009. Investigation of Crohn's disease risk loci in ulcerative colitis further defines their molecular relationship. *Gastroenterology* 136:523–29
8. Hampe J, Franke A, Rosenstiel P, Till A, Teuber M, et al. 2007. A genome-wide association scan of nonsynonymous SNPs identifies a susceptibility variant for Crohn disease in ATG16L1. *Nat. Genet.* 39:207–11
9. Wellcome Trust Case Control Consort. 2007. Genome-wide association study of 14,000 cases of seven common diseases and 3,000 shared controls. *Nature* 447:661–78
10. Franke A, Balschun T, Karlsen TH, Hedderich J, May S, et al. 2008. Replication of signals from recent studies of Crohn's disease identifies previously unknown disease loci for ulcerative colitis. *Nat. Genet.* 40:713–15
11. Rioux JD, Xavier RJ, Taylor KD, Silverberg MS, Goyette P, et al. 2007. Genome-wide association study identifies new susceptibility loci for Crohn disease and implicates autophagy in disease pathogenesis. *Nat. Genet.* 39:596–604
12. Libioulle C, Louis E, Hansoul S, Sandor C, Farnir F, et al. 2007. Novel Crohn disease locus identified by genome-wide association maps to a gene desert on 5p13.1 and modulates expression of PTGER4. *PLoS Genet.* 3:e58
13. Peltekova VD, Wintle RF, Rubin LA, Amos CI, Huang Q, et al. 2004. Functional variants of OCTN cation transporter genes are associated with Crohn disease. *Nat. Genet.* 36:471–75
14. Parkes M, Barrett JC, Prescott NJ, Tremelling M, Anderson CA, et al. 2007. Sequence variants in the autophagy gene IRGM and multiple other replicating loci contribute to Crohn's disease susceptibility. *Nat. Genet.* 39:830–32

15. Dideberg V, Kristjansdottir G, Milani L, Libioulle C, Sigurdsson S, et al. 2007. An insertion-deletion polymorphism in the interferon regulatory Factor 5 (IRF5) gene confers risk of inflammatory bowel diseases. *Hum. Mol. Genet.* 16:3008–16
16. De Jager PL, Franchimont D, Waliszewska A, Bitton A, Cohen A, et al. 2007. The role of the Toll receptor pathway in susceptibility to inflammatory bowel diseases. *Genes Immun.* 8:387–97
17. Zhernakova A, Festen EM, Franke L, Trynka G, van Diemen CC, et al. 2008. Genetic analysis of innate immunity in Crohn's disease and ulcerative colitis identifies two susceptibility loci harboring CARD9 and IL18RAP. *Am. J. Hum. Genet.* 82:1202–10
18. Stoll M, Corneliusen B, Costello CM, Waetzig GH, Mellgard B, et al. 2004. Genetic variation in DLG5 is associated with inflammatory bowel disease. *Nat. Genet.* 36:476–80
19. Renner M, Bergmann G, Krebs I, End C, Lyer S, et al. 2007. DMBT1 confers mucosal protection in vivo and a deletion variant is associated with Crohn's disease. *Gastroenterology* 133:1499–509
20. Franke A, Hampe J, Rosenstiel P, Becker C, Wagner F, et al. 2007. Systematic association mapping identifies NELL1 as a novel IBD disease gene. *PLoS ONE* 2:e691
21. Hugot JP, Chamaillard M, Zouali H, Lesage S, Cezard JP, et al. 2001. Association of NOD2 leucine-rich repeat variants with susceptibility to Crohn's disease. *Nature* 411:599–603
22. Ogura Y, Bonen DK, Inohara N, Nicolae DL, Chen FF, et al. 2001. A frameshift mutation in NOD2 associated with susceptibility to Crohn's disease. *Nature* 411:603–6
23. Hampe J, Cuthbert A, Croucher PJ, Mirza MM, Mascheretti S, et al. 2001. Association between insertion mutation in NOD2 gene and Crohn's disease in German and British populations. *Lancet* 357:1925–28
24. Kugathasan S, Baldassano RN, Bradfield JP, Sleiman PM, Imielinski M, et al. 2008. Loci on 20q13 and 21q22 are associated with pediatric-onset inflammatory bowel disease. *Nat. Genet.* 40:1211–15
25. Kaser A, Lee AH, Franke A, Glickman JN, Zeissig S, et al. 2008. XBP1 links ER stress to intestinal inflammation and confers genetic risk for human inflammatory bowel disease. *Cell* 134:743–56
26. Hanauer SB, Stromberg U. 2004. Oral Pentasa in the treatment of active Crohn's disease: A meta-analysis of double-blind, placebo-controlled trials. *Clin. Gastroenterol. Hepatol.* 2:379–88
27. Sandborn WJ, Feagan BG, Lichtenstein GR. 2007. Medical management of mild to moderate Crohn's disease: evidence-based treatment algorithms for induction and maintenance of remission. *Aliment. Pharmacol. Ther.* 26:987–1003
28. Akobeng AK, Gardener E. 2005. Oral 5-aminosalicylic acid for maintenance of medically-induced remission in Crohn's Disease. *Cochrane Database Syst. Rev.*: CD003715
29. Sutherland L, Macdonald JK. 2006. Oral 5-aminosalicylic acid for induction of remission in ulcerative colitis. *Cochrane Database Syst. Rev.*: CD000543
30. Sutherland L, Roth D, Beck P, May G, Makiyama K. 2000. Oral 5-aminosalicylic acid for maintaining remission in ulcerative colitis. *Cochrane Database Syst. Rev.*: CD000544

31. Benchimol EI, Seow CH, Steinhart AH, Griffiths AM. 2008. Traditional corticosteroids for induction of remission in Crohn's disease. *Cochrane Database Syst. Rev.*: CD006792
32. Steinhart AH, Ewe K, Griffiths AM, Modigliani R, Thomsen OO. 2003. Corticosteroids for maintenance of remission in Crohn's disease. *Cochrane Database Syst. Rev.*: CD000301
33. Truelove SC, Witts LJ. 1955. Cortisone in ulcerative colitis; final report on a therapeutic trial. *Br. Med. J.* 2:1041-48
34. Baron JH, Connell AM, Kanaghinis TG, Lennard-Jones JE, Jones AF. 1962. Out-patient treatment of ulcerative colitis. Comparison between three doses of oral prednisone. *Br. Med. J.* 2:441-43
35. Lennard-Jones JE, Misiewicz JJ, Connell AM, Baron JH, Jones FA. 1965. Prednisone as Maintenance Treatment for Ulcerative Colitis in Remission. *Lancet* 1:188-89
36. Pearson DC, May GR, Fick GH, Sutherland LR. 1995. Azathioprine and 6-mercaptopurine in Crohn disease. A meta-analysis. *Ann. Intern. Med.* 123:132-42
37. Ardizzone S, Maconi G, Russo A, Imbesi V, Colombo E, et al. 2006. Randomised controlled trial of azathioprine and 5-aminosalicylic acid for treatment of steroid dependent ulcerative colitis. *Gut* 55:47-53
38. Hawthorne AB, Logan RF, Hawkey CJ, Foster PN, Axon AT, et al. 1992. Randomised controlled trial of azathioprine withdrawal in ulcerative colitis. *B.M.J.* 305:20-22
39. Alfadhli AA, McDonald JW, Feagan BG. 2005. Methotrexate for induction of remission in refractory Crohn's disease. *Cochrane Database Syst. Rev.*: CD003459
40. Feagan BG, Fedorak RN, Irvine EJ, Wild G, Sutherland L, et al. 2000. A comparison of methotrexate with placebo for the maintenance of remission in Crohn's disease. North American Crohn's Study Group Investigators. *N. Engl. J. Med.* 342:1627-32
41. McDonald JW, Feagan BG, Jewell D, Brynskov J, Stange EF, et al. 2005. Cyclosporine for induction of remission in Crohn's disease. *Cochrane Database Syst. Rev.*: CD000297
42. Lichtiger S, Present DH, Kornbluth A, Gelernt I, Bauer J, et al. 1994. Cyclosporine in severe ulcerative colitis refractory to steroid therapy. *N. Engl. J. Med.* 330:1841-45
43. Van Assche G, D'Haens G, Noman M, Vermeire S, Hiele M, et al. 2003. Randomized, double-blind comparison of 4 mg/kg versus 2 mg/kg intravenous cyclosporine in severe ulcerative colitis. *Gastroenterology* 125:1025-31
44. Ogata H, Matsui T, Nakamura M, Iida M, Takazoe M, et al. 2006. A randomised dose finding study of oral tacrolimus (FK506) therapy in refractory ulcerative colitis. *Gut* 55:1255-62
45. Rahimi R, Nikfar S, Rezaie A, Abdollahi M. 2006. A meta-analysis of broad-spectrum antibiotic therapy in patients with active Crohn's disease. *Clin. Ther.* 28:1983-88
46. Rahimi R, Nikfar S, Rezaie A, Abdollahi M. 2007. A meta-analysis of antibiotic therapy for active ulcerative colitis. *Dig. Dis. Sci.* 52:2920-25
47. Targan SR, Hanauer SB, van Deventer SJ, Mayer L, Present DH, et al. 1997. A short-term study of chimeric monoclonal antibody cA2 to tumor necrosis factor alpha for Crohn's disease. Crohn's Disease cA2 Study Group. *N. Engl. J. Med.* 337:1029-35
48. Hanauer SB, Feagan BG, Lichtenstein GR, Mayer LF, Schreiber S, et al. 2002. Maintenance infliximab for Crohn's disease: the ACCENT I randomised trial. *Lancet* 359:1541-49



49. Rutgeerts P, Feagan BG, Lichtenstein GR, Mayer LF, Schreiber S, et al. 2004. Comparison of scheduled and episodic treatment strategies of infliximab in Crohn's disease. *Gastroenterology* 126:402–13
50. Sands BE, Anderson FH, Bernstein CN, Chey WY, Feagan BG, et al. 2004. Infliximab maintenance therapy for fistulizing Crohn's disease. *N. Engl. J. Med.* 350:876–85
51. Rutgeerts P, Sandborn WJ, Feagan BG, Reinisch W, Olson A, et al. 2005. Infliximab for induction and maintenance therapy for ulcerative colitis. *N. Engl. J. Med.* 353:2462–76
52. Hanauer SB, Sandborn WJ, Rutgeerts P, Fedorak RN, Lukas M, et al. 2006. Human anti-tumor necrosis factor monoclonal antibody (adalimumab) in Crohn's disease: the CLASSIC-I trial. *Gastroenterology* 130:323–33
53. Sandborn WJ, Hanauer SB, Rutgeerts P, Fedorak RN, Lukas M, et al. 2007. Adalimumab for maintenance treatment of Crohn's disease: results of the CLASSIC II trial. *Gut* 56:1232–39
54. Colombel JF, Sandborn WJ, Rutgeerts P, Enns R, Hanauer SB, et al. 2007. Adalimumab for maintenance of clinical response and remission in patients with Crohn's disease: the CHARM trial. *Gastroenterology* 132:52–65
55. Sandborn WJ, Feagan BG, Stoinov S, Honiball PJ, Rutgeerts P, et al. 2007. Certolizumab pegol for the treatment of Crohn's disease. *N. Engl. J. Med.* 357:228–38
56. Schreiber S, Khaliq-Kareemi M, Lawrance IC, Thomsen OO, Hanauer SB, et al. 2007. Maintenance therapy with certolizumab pegol for Crohn's disease. *N. Engl. J. Med.* 357:239–50
57. Reinisch W, de Villiers W, Bene L, Simon L, Racz I, et al. 2010. Fontolizumab in moderate to severe Crohn's disease: A phase 2, randomized, double-blind, placebo-controlled, multiple-dose study. *Inflamm. Bowel Dis.* 16:233–42
58. Hommes DW, Mikhajlova TL, Stoinov S, Stimac D, Vucelic B, et al. 2006. Fontolizumab, a humanised anti-interferon gamma antibody, demonstrates safety and clinical activity in patients with moderate to severe Crohn's disease. *Gut* 55:1131–37
59. Mannon PJ, Fuss IJ, Mayer L, Elson CO, Sandborn WJ, et al. 2004. Anti-interleukin-12 antibody for active Crohn's disease. *N. Engl. J. Med.* 351:2069–79
60. Sandborn WJ, Feagan BG, Fedorak RN, Scherl E, Fleisher MR, et al. 2008. A randomized trial of Ustekinumab, a human interleukin-12/23 monoclonal antibody, in patients with moderate-to-severe Crohn's disease. *Gastroenterology* 135:1130–41
61. Burakoff R, Barish CF, Riff D, Pruitt R, Chey WY, et al. 2006. A phase 1/2A trial of STA 5326, an oral interleukin-12/23 inhibitor, in patients with active moderate to severe Crohn's disease. *Inflamm. Bowel Dis.* 12:558–65
62. Ito H, Takazoe M, Fukuda Y, Hibi T, Kusugami K, et al. 2004. A pilot randomized trial of a human anti-interleukin-6 receptor monoclonal antibody in active Crohn's disease. *Gastroenterology* 126:989–96
63. Schreiber S, Fedorak RN, Nielsen OH, Wild G, Williams CN, et al. 2000. Safety and efficacy of recombinant human interleukin 10 in chronic active Crohn's disease. Crohn's Disease IL-10 Cooperative Study Group. *Gastroenterology* 119:1461–72
64. Fedorak RN, Gangl A, Elson CO, Rutgeerts P, Schreiber S, et al. 2000. Recombinant human interleukin 10 in the treatment of patients with mild to moderately active

- Crohn's disease. The Interleukin 10 Inflammatory Bowel Disease Cooperative Study Group. *Gastroenterology* 119:1473–82
65. Schreiber S, Fedorak RN, Wild G, Gangl A, Targan S, et al. 1998. Safety and tolerance of rHuIL-10 treatment in patients with mild/moderate active ulcerative colitis (abstr.). *Gastroenterology* 114:A1080–A1081
  66. Herrlinger KR, Witthoef T, Raedler A, Bokemeyer B, Krummenerl T, et al. 2006. Randomized, double blind controlled trial of subcutaneous recombinant human interleukin-11 versus prednisolone in active Crohn's disease. *Am. J. Gastroenterol.* 101:793–97
  67. Tilg H, Vogelsang H, Ludwiczek O, Lochs H, Kaser A, et al. 2003. A randomised placebo controlled trial of pegylated interferon alpha in active ulcerative colitis. *Gut* 52:1728–33
  68. Pena Rossi C, Hanauer SB, Tomasevic R, Hunter JO, Shafran I, et al. 2009. Interferon beta-1a for the maintenance of remission in patients with Crohn's disease: results of a phase II dose-finding study. *BMC Gastroenterol.* 9:22
  69. Seow CH, Benchimol EI, Griffiths AM, Steinhart AH. 2008. Type I interferons for induction of remission in ulcerative colitis. *Cochrane Database Syst. Rev.*: CD006790
  70. Pena-Rossi C, Schreiber S, Golubovic G, Mertz-Nielsen A, Panes J, et al. 2008. Clinical trial: a multicentre, randomized, double-blind, placebo-controlled, dose-finding, phase II study of subcutaneous interferon-beta-1a in moderately active ulcerative colitis. *Aliment. Pharmacol. Ther.* 28:758–67
  71. Travis S, Yap LM, Hawkey C, Warren B, Lazarov M, et al. 2005. RDP58 is a novel and potentially effective oral therapy for ulcerative colitis. *Inflamm. Bowel Dis.* 11:713–19
  72. Ghosh S, Goldin E, Gordon FH, Malchow HA, Rask-Madsen J, et al. 2003. Natalizumab for active Crohn's disease. *N. Engl. J. Med.* 348:24–32
  73. Sandborn WJ, Colombel JF, Enns R, Feagan BG, Hanauer SB, et al. 2005. Natalizumab induction and maintenance therapy for Crohn's disease. *N. Engl. J. Med.* 353:1912–25
  74. Targan SR, Feagan BG, Fedorak RN, Lashner BA, Panaccione R, et al. 2007. Natalizumab for the treatment of active Crohn's disease: results of the ENCORE Trial. *Gastroenterology* 132:1672–83
  75. Feagan BG, Greenberg G, Wild G, McDonald JWD, Fedorak R, et al. 2003. Efficacy and safety of a humanized alpha 4 beta 7 antibody in active Crohn's disease (CD) (abstr.). *Gastroenterology* 124:A25–A26
  76. Feagan BG, Greenberg GR, Wild G, Fedorak RN, Pare P, et al. 2005. Treatment of ulcerative colitis with a humanized antibody to the alpha4beta7 integrin. *N. Engl. J. Med.* 352:2499–507
  77. Yacyshyn B, Chey WY, Wedel MK, Yu RZ, Paul D, et al. 2007. A randomized, double-masked, placebo-controlled study of alicaforsen, an antisense inhibitor of intercellular adhesion molecule 1, for the treatment of subjects with active Crohn's disease. *Clin. Gastroenterol. Hepatol.* 5:215–20
  78. van Deventer SJ, Wedel MK, Baker BF, Xia S, Chuang E, et al. 2006. A phase II dose ranging, double-blind, placebo-controlled study of alicaforsen enema in subjects with acute exacerbation of mild to moderate left-sided ulcerative colitis. *Aliment. Pharmacol. Ther.* 23:1415–25

79. Keshav S, Ungashe S, Zheng W, Bekker P, Wright K, et al. 2007. Ccx282-B, an orally active inhibitor of chemokine receptor CCR9, shows anti-inflammatory & clinical activity in the treatment of Crohn's disease (abstr.). *Gastroenterology* 132:A157
80. Keshav S, Johnson D, Bekker P, Schall TJ. 2009. PROTECT-1 Study Demonstrated Efficacy of the Intestine-Specific Chemokine Receptor Antagonist CCX282-B (Traficet-EN) in Treatment of Patients with Moderate to Severe Crohn's Disease (abstr.). *Gastroenterology* 136:A65
81. Sands BE, Sandborn WJ, Creed TJ, Dayan CM, Van Assche G, et al. 2009. A randomized, double-blind, placebo-controlled trial of basiliximab with concomitant corticosteroids in steroid-refractory ulcerative colitis (abstr.). *Gastroenterology* 136:A65
82. Van Assche G, Sandborn WJ, Feagan BG, Salzberg BA, Silvers D, et al. 2006. Daclizumab, a humanised monoclonal antibody to the interleukin 2 receptor (CD25), for the treatment of moderately to severely active ulcerative colitis: a randomised, double blind, placebo controlled, dose ranging trial. *Gut* 55:1568-74
83. Kasran A, Boon L, Wortel CH, Hogezaand RA, Schreiber S, et al. 2005. Safety and tolerability of antagonist anti-human CD40 Mab ch5D12 in patients with moderate to severe Crohn's disease. *Aliment. Pharmacol. Ther.* 22:111-22
84. Oyama Y, Craig RM, Traynor AE, Quigley K, Statkute L, et al. 2005. Autologous hematopoietic stem cell transplantation in patients with refractory Crohn's disease. *Gastroenterology* 128:552-63
85. Cassinotti A, Annaloro C, Ardizzone S, Onida F, Della Volpe A, et al. 2008. Autologous haematopoietic stem cell transplantation without CD34+ cell selection in refractory Crohn's disease. *Gut* 57:211-17
86. Lopez-Cubero SO, Sullivan KM, McDonald GB. 1998. Course of Crohn's disease after allogeneic marrow transplantation. *Gastroenterology* 114:433-40
87. Ditschkowski M, Einsele H, Schwerdtfeger R, Bunjes D, Trenscher R, et al. 2003. Improvement of inflammatory bowel disease after allogeneic stem-cell transplantation. *Transplantation* 75:1745-47
88. Sands BE, Sandborn WJ, Feagan B, Lofberg R, Hibi T, et al. 2008. A randomized, double-blind, sham-controlled study of granulocyte/monocyte apheresis for active ulcerative colitis. *Gastroenterology* 135:400-9
89. Hommes D, van den Blink B, Plasse T, Bartelsman J, Xu C, et al. 2002. Inhibition of stress-activated MAP kinases induces clinical improvement in moderate to severe Crohn's disease. *Gastroenterology* 122:7-14
90. Schreiber S, Feagan B, D'Haens G, Colombel JF, Geboes K, et al. 2006. Oral p38 mitogen-activated protein kinase inhibition with BIRB 796 for active Crohn's disease: a randomized, double-blind, placebo-controlled trial. *Clin. Gastroenterol. Hepatol.* 4:325-34
91. Korzenik JR, Dieckgraefe BK, Valentine JF, Hausman DF, Gilbert MJ. 2005. Sargramostim for active Crohn's disease. *N. Engl. J. Med.* 352:2193-201
92. Valentine JF, Fedorak RN, Feagan B, Fredlund P, Schmitt R, et al. 2009. Steroid-sparing Properties of Sargramostim in Patients With Corticosteroid-dependent Crohn's disease: A Randomised, Double-blind, Placebo-controlled, Phase 2 Study. *Gut* 58:1354-62

93. Slonim AE, Bulone L, Damore MB, Goldberg T, Wingertzahn MA, et al. 2000. A preliminary study of growth hormone therapy for Crohn's disease. *N. Engl. J. Med.* 342:1633–37
94. Sandborn WJ, Sands BE, Wolf DC, Valentine JF, Safdi M, et al. 2003. Repifermin (keratinocyte growth factor-2) for the treatment of active ulcerative colitis: a randomized, double-blind, placebo-controlled, dose-escalation trial. *Aliment. Pharmacol. Ther.* 17:1355–64
95. Sinha A, Nightingale J, West KP, Berlanga-Acosta J, Playford RJ. 2003. Epidermal growth factor enemas with oral mesalamine for mild-to-moderate left-sided ulcerative colitis or proctitis. *N. Engl. J. Med.* 349:350–57
96. Lewis JD, Lichtenstein GR, Deren JJ, Sands BE, Hanauer SB, et al. 2008. Rosiglitazone for active ulcerative colitis: a randomized placebo-controlled trial. *Gastroenterology* 134:688–95
97. Schreiber S, Keshavarzian A, Isaacs KL, Schollenberger J, Guzman JP, et al. 2007. A randomized, placebo-controlled, phase II study of tetomilast in active ulcerative colitis. *Gastroenterology* 132:76–86
98. Reinisch W, Panes J, Lemann M, Schreiber S, Feagan B, et al. 2008. A multicenter, randomized, double-blind trial of everolimus versus azathioprine and placebo to maintain steroid-induced remission in patients with moderate-to-severe active Crohn's disease. *Am. J. Gastroenterol.* 103:2284–92
99. Shen B, Pardi DS, Bennett AE, Queener E, Kammer P, et al. 2009. The efficacy and tolerability of AST-120 (spherical carbon adsorbent) in active pouchitis. *Am. J. Gastroenterol.* 104:1468–74
100. Mansfield JC, Parkes M, Hawthorne AB, Forbes A, Probert CS, et al. 2007. A randomized, double-blind, placebo-controlled trial of lenalidomide in the treatment of moderately severe active Crohn's disease. *Aliment. Pharmacol. Ther.* 26:421–30
101. Srinivasan R, Akobeng AK. 2009. Thalidomide and thalidomide analogues for induction of remission in Crohn's disease. *Cochrane Database Syst. Rev.*: CD007350
102. Feagan BG, Sandborn WJ, Mittmann U, Bar-Meir S, D'Haens G, et al. 2008. Omega-3 free fatty acids for the maintenance of remission in Crohn disease: the EPIC Randomized Controlled Trials. *JAMA* 299:1690–97
103. Rolfe VE, Fortun PJ, Hawkey CJ, Bath-Hextall F. 2006. Probiotics for maintenance of remission in Crohn's disease. *Cochrane Database Syst. Rev.*: CD004826
104. Mallon P, McKay D, Kirk S, Gardiner K. 2007. Probiotics for induction of remission in ulcerative colitis. *Cochrane Database Syst. Rev.*: CD005573
